# Supplementary material for: Introgression of SbERD4 Gene Encodes an Early-Responsive Dehydration-Stress Protein That Confers Tolerance against Different Types of Abiotic Stresses in Transgenic Tobacco
Source: MDPI journal article supplement (doi:10.3390/cells11010062), 2021-12-27
Supplement: s1 [file s1]

**Table S1: Primers and PCR conditions used in the study.**

| Purpose                                                                                | Primer                | Orientation | Sequence (5'-3')               | PCR conditions                                                                                      |
|----------------------------------------------------------------------------------------|-----------------------|-------------|--------------------------------|-----------------------------------------------------------------------------------------------------|
| RACE<br>(Rapid Amplification of cDNA Ends)                                             | GSP5-C38R1            | Reverse     | AAGTAGACCGCACCAAATG            | As suggested 5' RACE System for Rapid Amplification of cDNA Ends, version 2.0                       |
|                                                                                        | GSP5-C38R2            | Reverse     | CCATGCTTCTTTCACTTCAG           |                                                                                                     |
|                                                                                        | GSP5-C38R3            | Reverse     | AATGGCAAGTGTACAGCAA            |                                                                                                     |
|                                                                                        | GSP5-C38R4            | Reverse     | AACTCCAAACCATCCTCG             |                                                                                                     |
|                                                                                        | GSP5-C38R5            | Reverse     | ACGAATGCAAAGATCAACG            |                                                                                                     |
|                                                                                        | GSP5-C38R6            | Reverse     | CCATGGCTTCTTTCACTTCAG          |                                                                                                     |
| Full length, semi quantitative Rt PCR and confirmation of transgenic lines             | ERD4-F                | Forward     | ATGGATTTTCAGTTCGTTTGTA         | 95 °C, 5 min; 35 Cycles: 95 °C, 50 s; 55 °C, 30 s; 72 °C, 45 s; Extension: 72 °C, 7 min; 4 °C hold  |
|                                                                                        | ERD4-R                | Reverse     | TTAAGCATCACCAACGTGAT           |                                                                                                     |
| Transcript profiling                                                                   | ERD4RT-F              | Forward     | CGACAAGGTTTCCAGCTGA            | 95 °C, 3 min; 35 Cycles: 95 °C, 30 s; 55 °C, 30 s; 72 °C, 30 s; Extension: 72 °C, 10 min; 4 °C hold |
|                                                                                        | ERD4RT-R              | Reverse     | CACATCCTCCCATAGCTCT            |                                                                                                     |
| Cloning for subcellular localization study                                             | ERD4SL-F              | Forward     | CACC ATGGATTTTCAGTTCGTTTGTA    | 94 °C, 5 min; 35 Cycles: 94 °C, 30 s; 55 °C, 30 s; 72 °C, 30 s; Extension: 72 °C, 10 min; 4 °C hold |
|                                                                                        | ERD4SL-R              | Reverse     | TTAAGCATCACCAACGTGAT           |                                                                                                     |
| Cloning in pRT101 vector                                                               | ERD4pRT-F             | Forward     | CTCGAGAATGGATTTTCAGTTCGTTTAAAC | 94 °C, 5 min; 32 Cycles: 94 °C, 30 s; 58 °C, 40 s; 72 °C, 50 s; 72 °C, 10 min; 4 °C hold            |
|                                                                                        | ERD4pRT-R             | Reverse     | GGATCCTTAAGCATCACCAACGTGATCATA |                                                                                                     |
| Expression analysis of antioxidant enzyme encoding genes by quantitative real time PCR | <i>Nt</i> APX-F       | Forward     | CAAATGTAAGAGGAACTCAGAGGA       | 95 °C, 1 min; 40 Cycles: 94 °C, 10 s; 60 °C, 10 s; 72 °C, 15 s; Extension: 72 °C, 10 min; 4 °C hold |
|                                                                                        | <i>Nt</i> APX-R       | Reverse     | CAGCCTTGAGCCTCATGGTACCG        |                                                                                                     |
|                                                                                        | <i>Nt</i> CAT-F       | Forward     | AGGTACCGCTCATTCACACC           |                                                                                                     |
|                                                                                        | <i>Nt</i> CAT-R       | Reverse     | AAGCAAGCTTTTGACCCAGA           |                                                                                                     |
|                                                                                        | <i>Nt</i> SOD-F       | Forward     | AGCTACATACGCCTTTCC             |                                                                                                     |
|                                                                                        | <i>Nt</i> SOD-R       | Reverse     | CCCTGTAAAGCAGCACCTTC           |                                                                                                     |
|                                                                                        | <i>Nt</i> GR-F        | Forward     | ATAGATTCTGATGCTGCCCTTG         |                                                                                                     |
|                                                                                        | <i>Nt</i> GR-R        | Reverse     | CGACTCCTCAGTATGGAAC TCAA       |                                                                                                     |
| Reference genes                                                                        | <i>Sb</i> β-tubline-F | Forward     | GGAGTCACCGAGGCAGAG             | 95 °C, 5 min; 32 Cycles: 95 °C, 50 s; 58 °C, 45 s; 72 °C, 1 min; Extension: 72 °C, 7 min; 4 °C hold |
|                                                                                        | <i>Sb</i> β-tubline-R | Reverse     | ATCACATATCAGAAACCACAA          |                                                                                                     |
|                                                                                        | <i>uidA</i> -F        | Forward     | GATCGCGAAAACGTGGAAT            |                                                                                                     |
|                                                                                        | <i>uidA</i> -R        | Reverse     | TGAGCGTCGCAGAACATTAC           |                                                                                                     |
|                                                                                        | <i>Nt</i> Actin-F     | Forward     | CGTTTGGATCTTGCTGGTCGT          |                                                                                                     |
|                                                                                        | <i>Nt</i> Actin-R     | Reverse     | CAGCAATGCCAGGGAACATAG          |                                                                                                     |
|                                                                                        | <i>hptII</i> -F       | Forward     | TTCTTTGCCCTCGGACGAGTG          |                                                                                                     |
|                                                                                        | <i>hptII</i> -R       | Reverse     | ACAGCGTCTCCGACCTGATG           |                                                                                                     |

**A**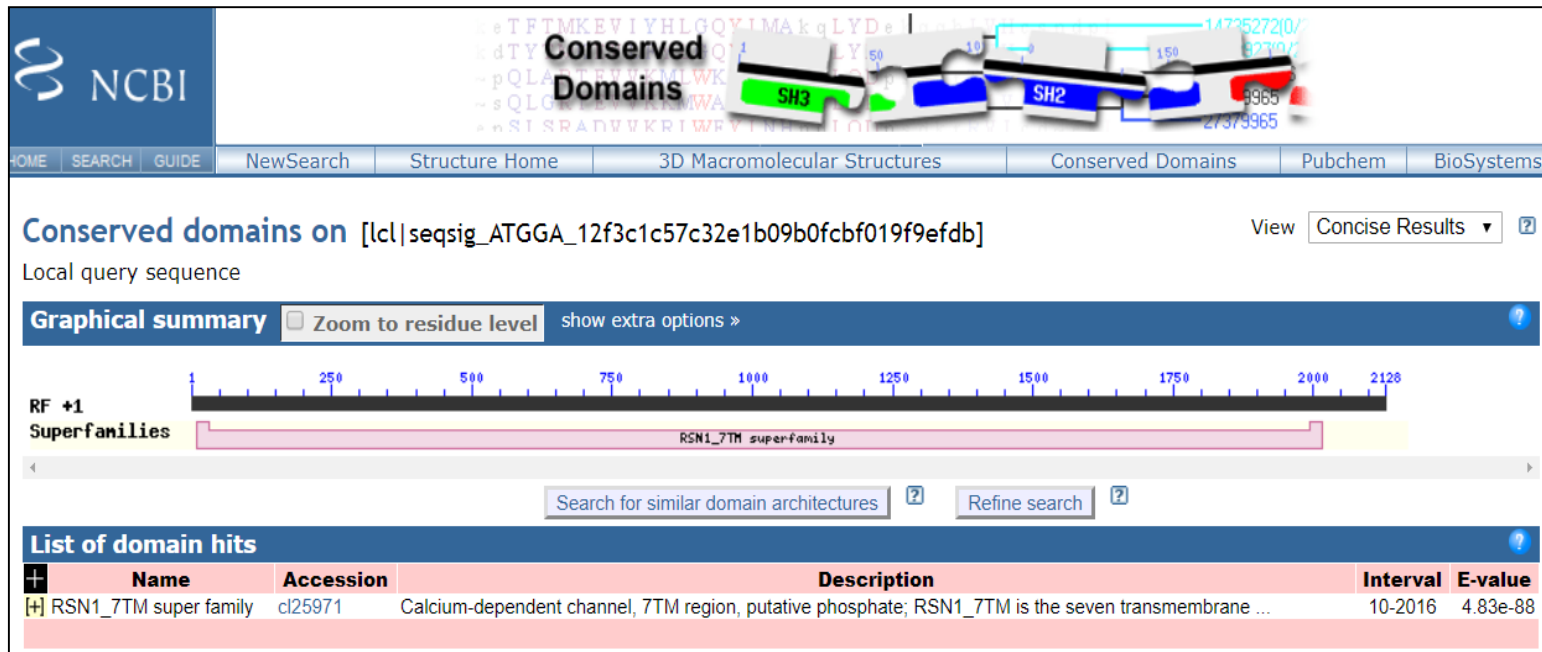**B**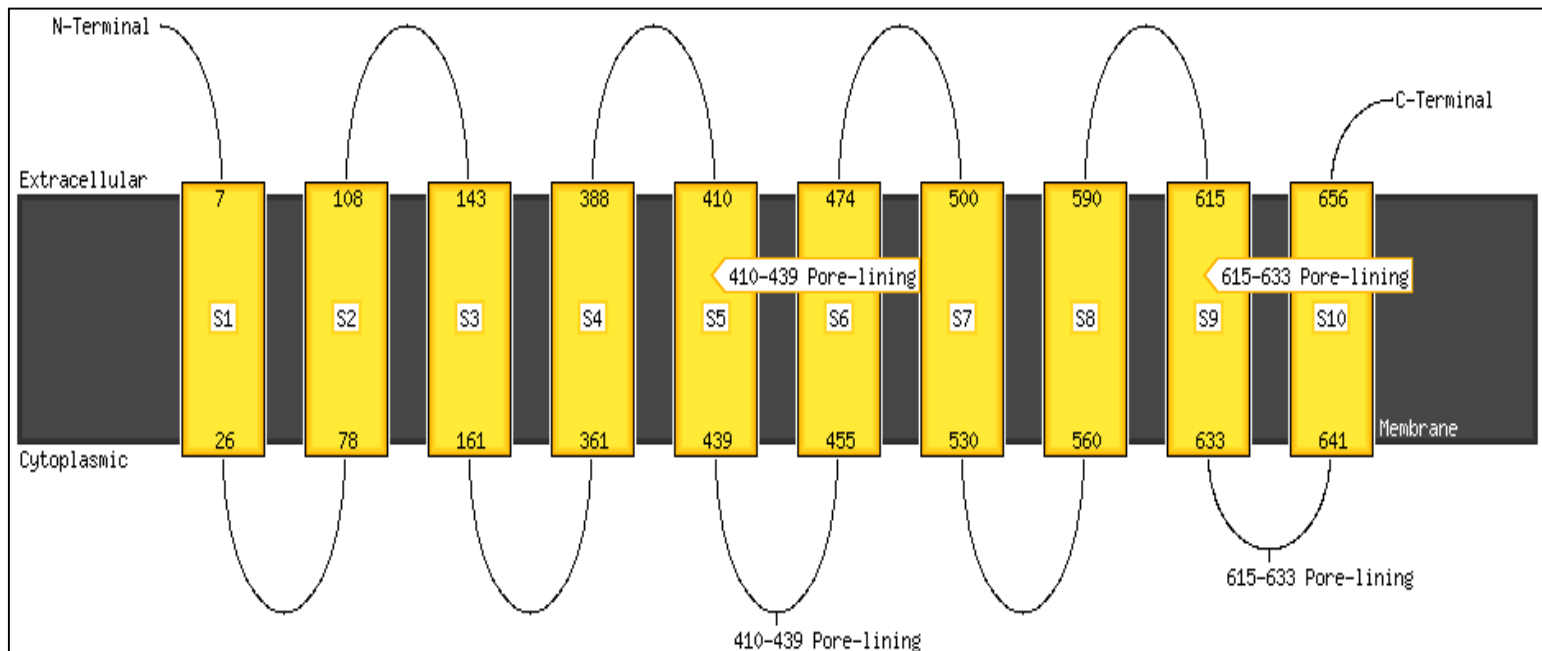

**Figure S1: *In silico* analysis of *SbERD4* protein.** (A) *SbERD4* protein resembles the Ca-dependent channel, and (B) the *SbERD4* protein comprises 10-transmembrane domains

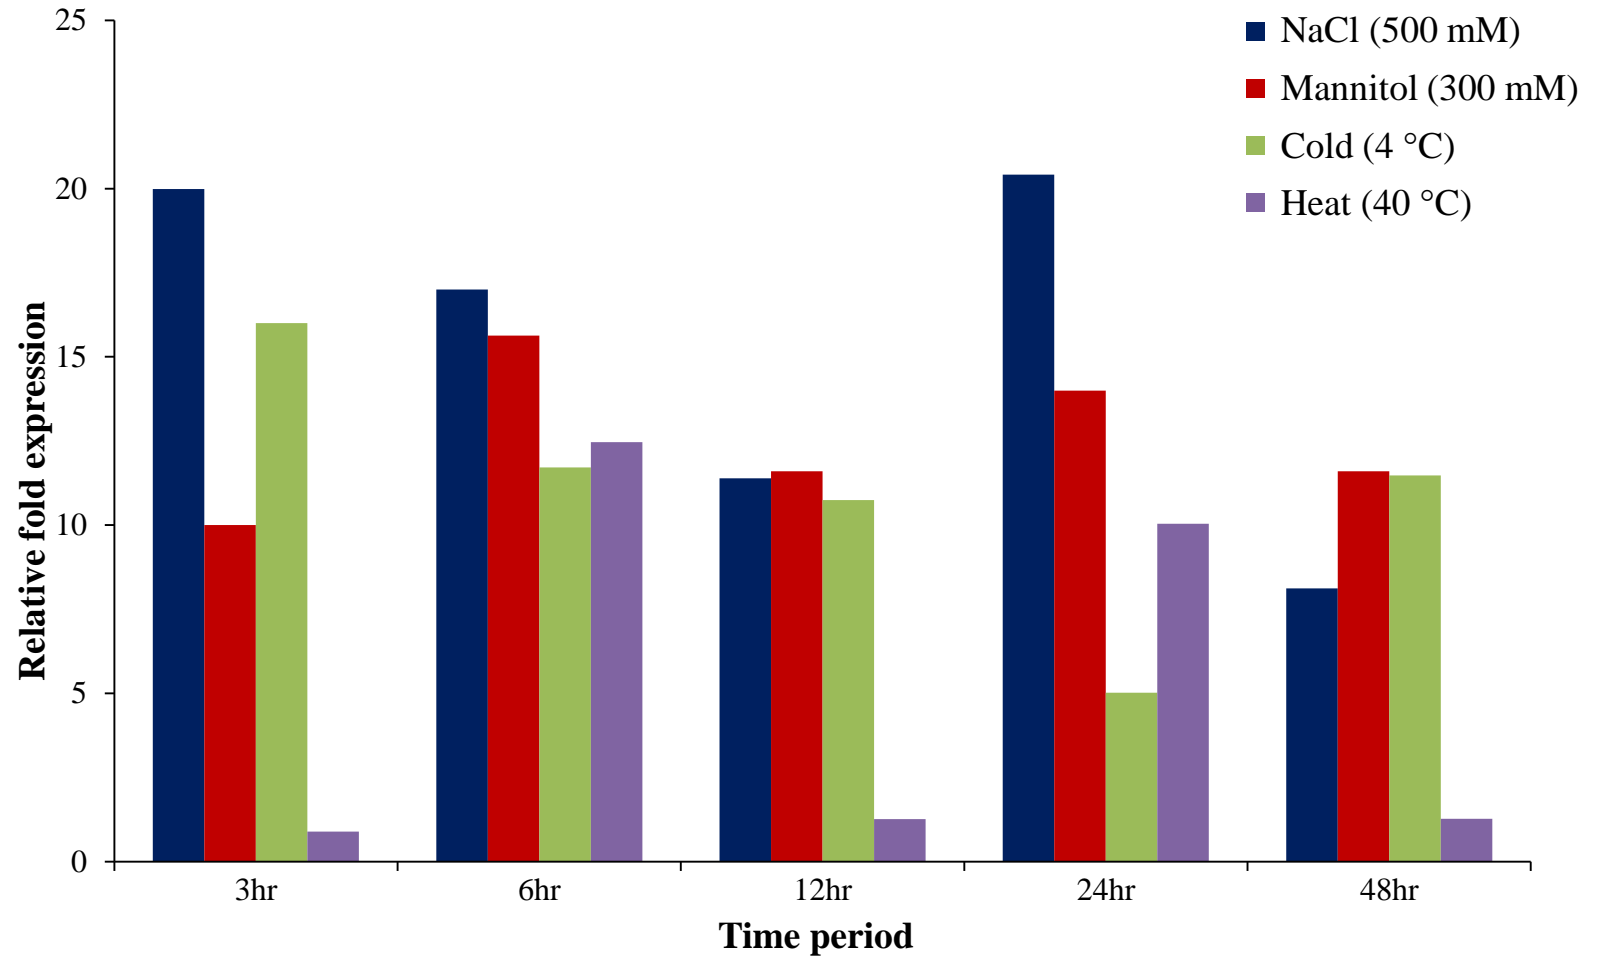

**Figure S2: Transcript expression analysis of the *SbERD4* gene.** Relative expression of the *SbERD4* gene was analyzed under different abiotic stress treatments; salinity (500 mM NaCl), drought (300 mM mannitol), cold (4 °C), and heat (40 °C) up to 48 h (3, 6, 12, 24, and 48 h).

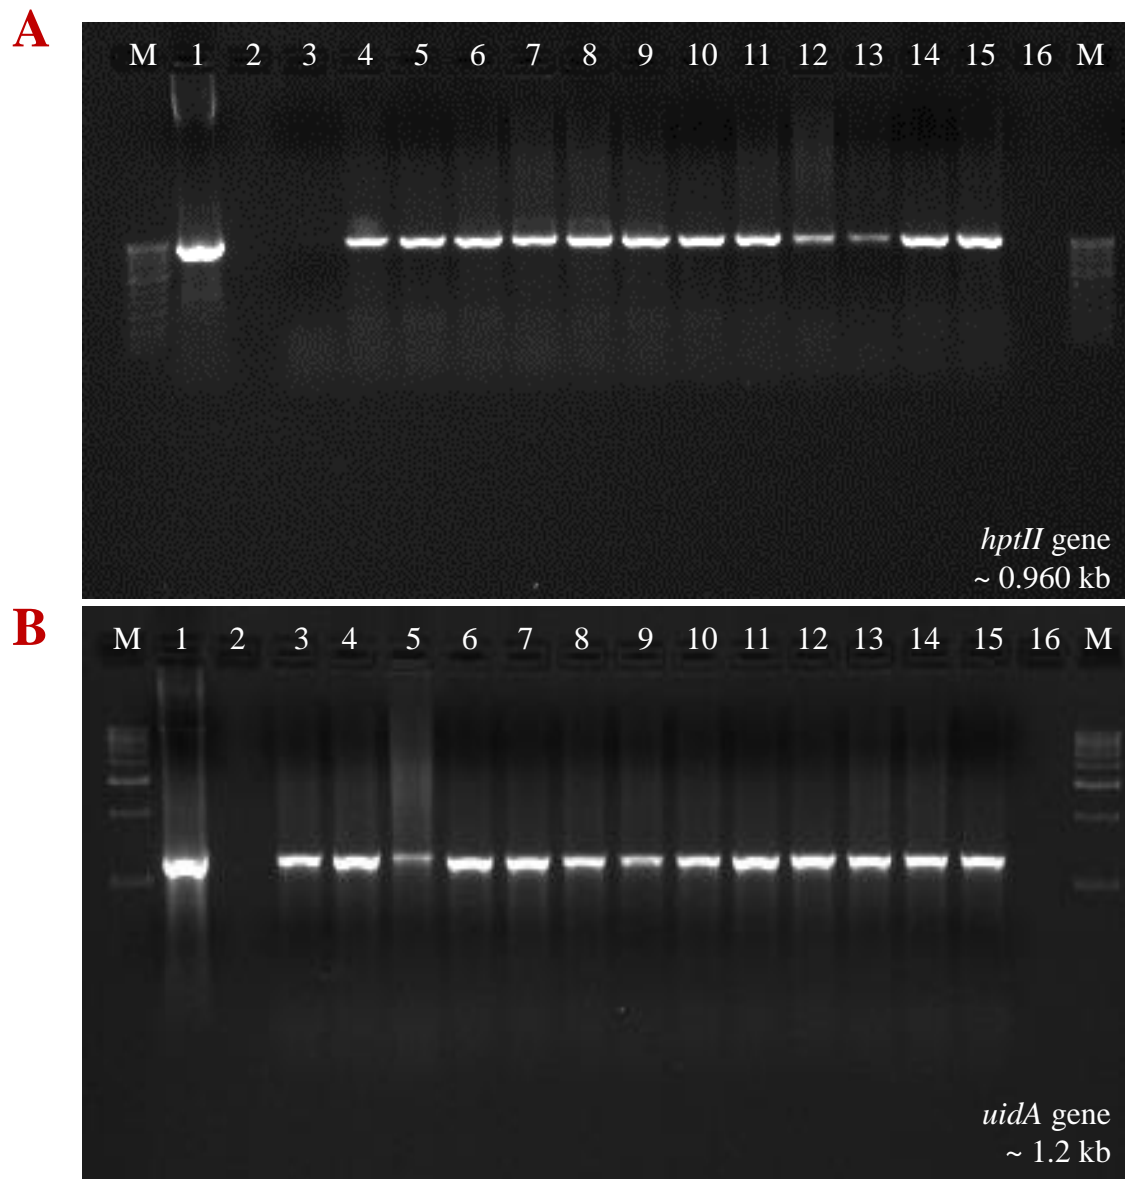

**Figure S3: Molecular confirmation of putative transgenic lines.** Agarose gels showing PCR amplification of (A) *hptII* and (B) *uidA* genes. Lane M: marker, Lane 1: +ve control (i.e. gene construct *pCAMBIA1301::35SSbERD4* used as templet), Lane 2: -ve control (i.e. DNA from WT used as templet), Lane 3–16: randomly selected putative transgenic lines.

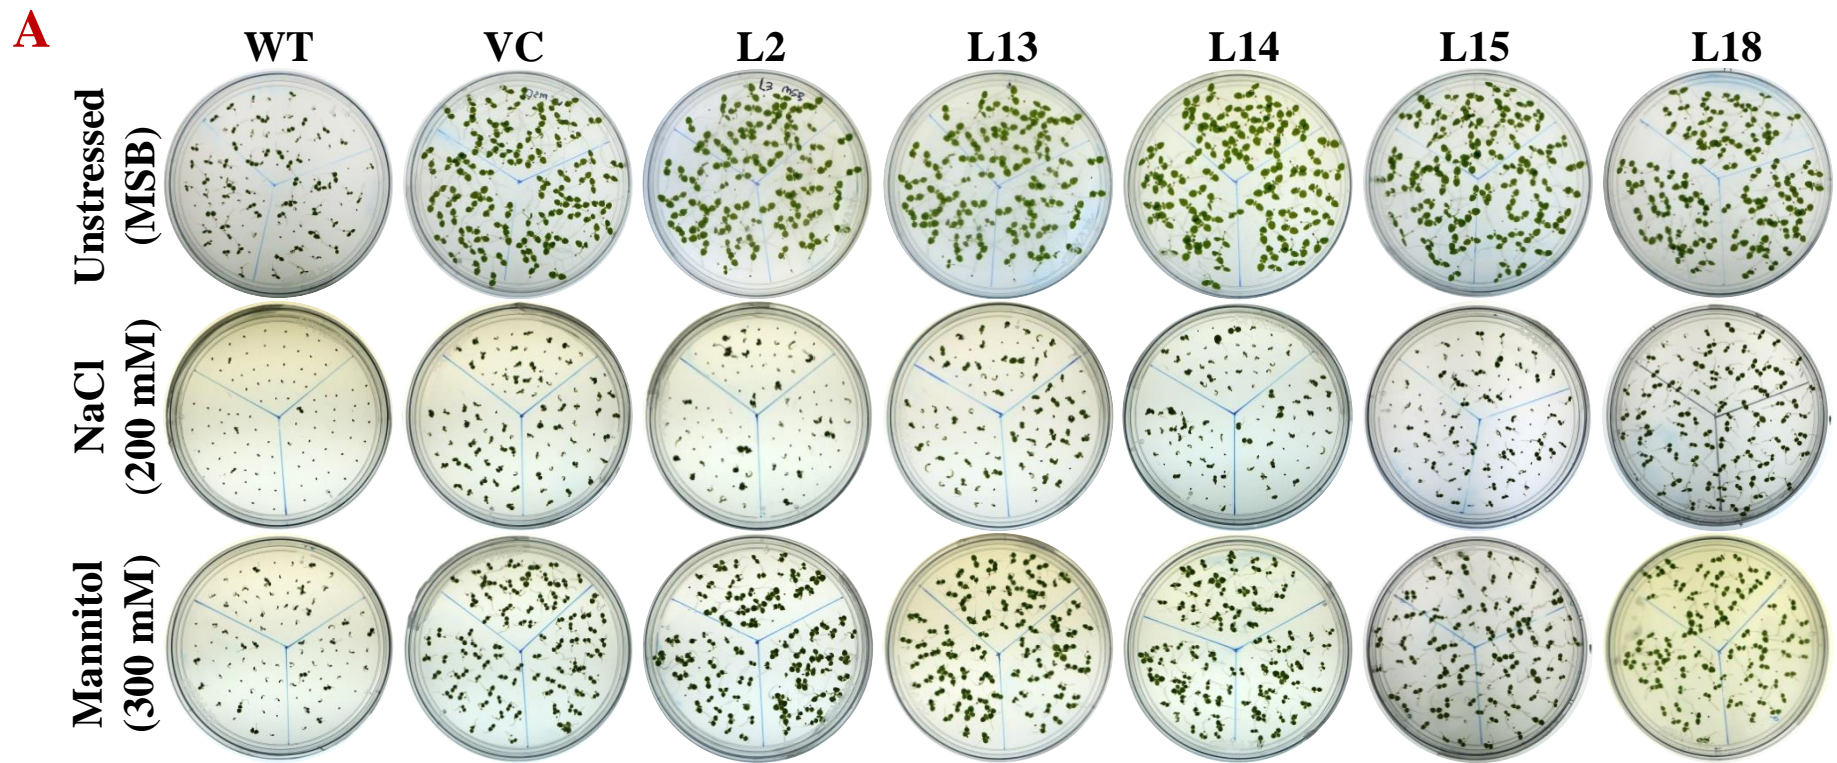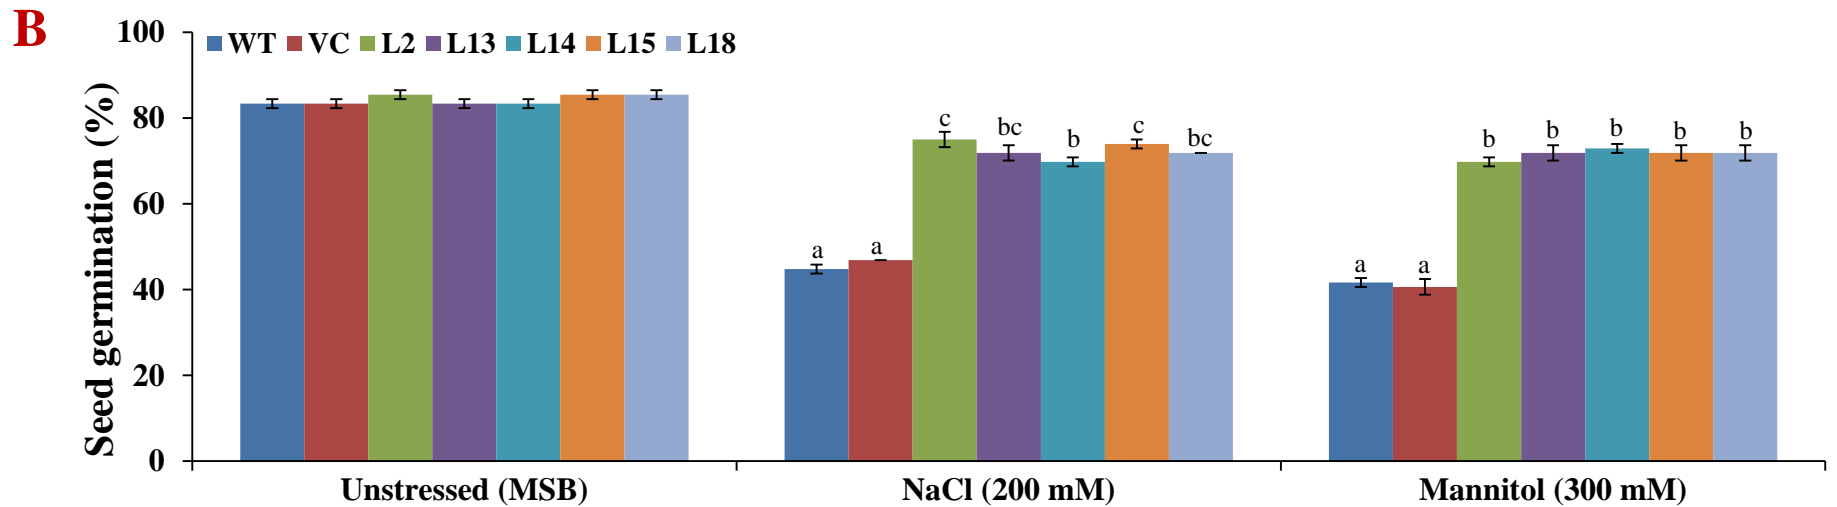

**Figure S4: Seed germination analysis.** Seeds of *SbERD4* overexpressing transgenic lines (L2, L13, L14, L15 and L18) and control plants (WT and VC) were germinated on (A) MSB (Murashige & Skoog Basal) media supplemented with NaCl (200 mM) or mannitol (300 mM) for (B) percentage seed-germination analysis. Bars represent means  $\pm$  SE and values with different letters are significant at  $p < 0.05$ .



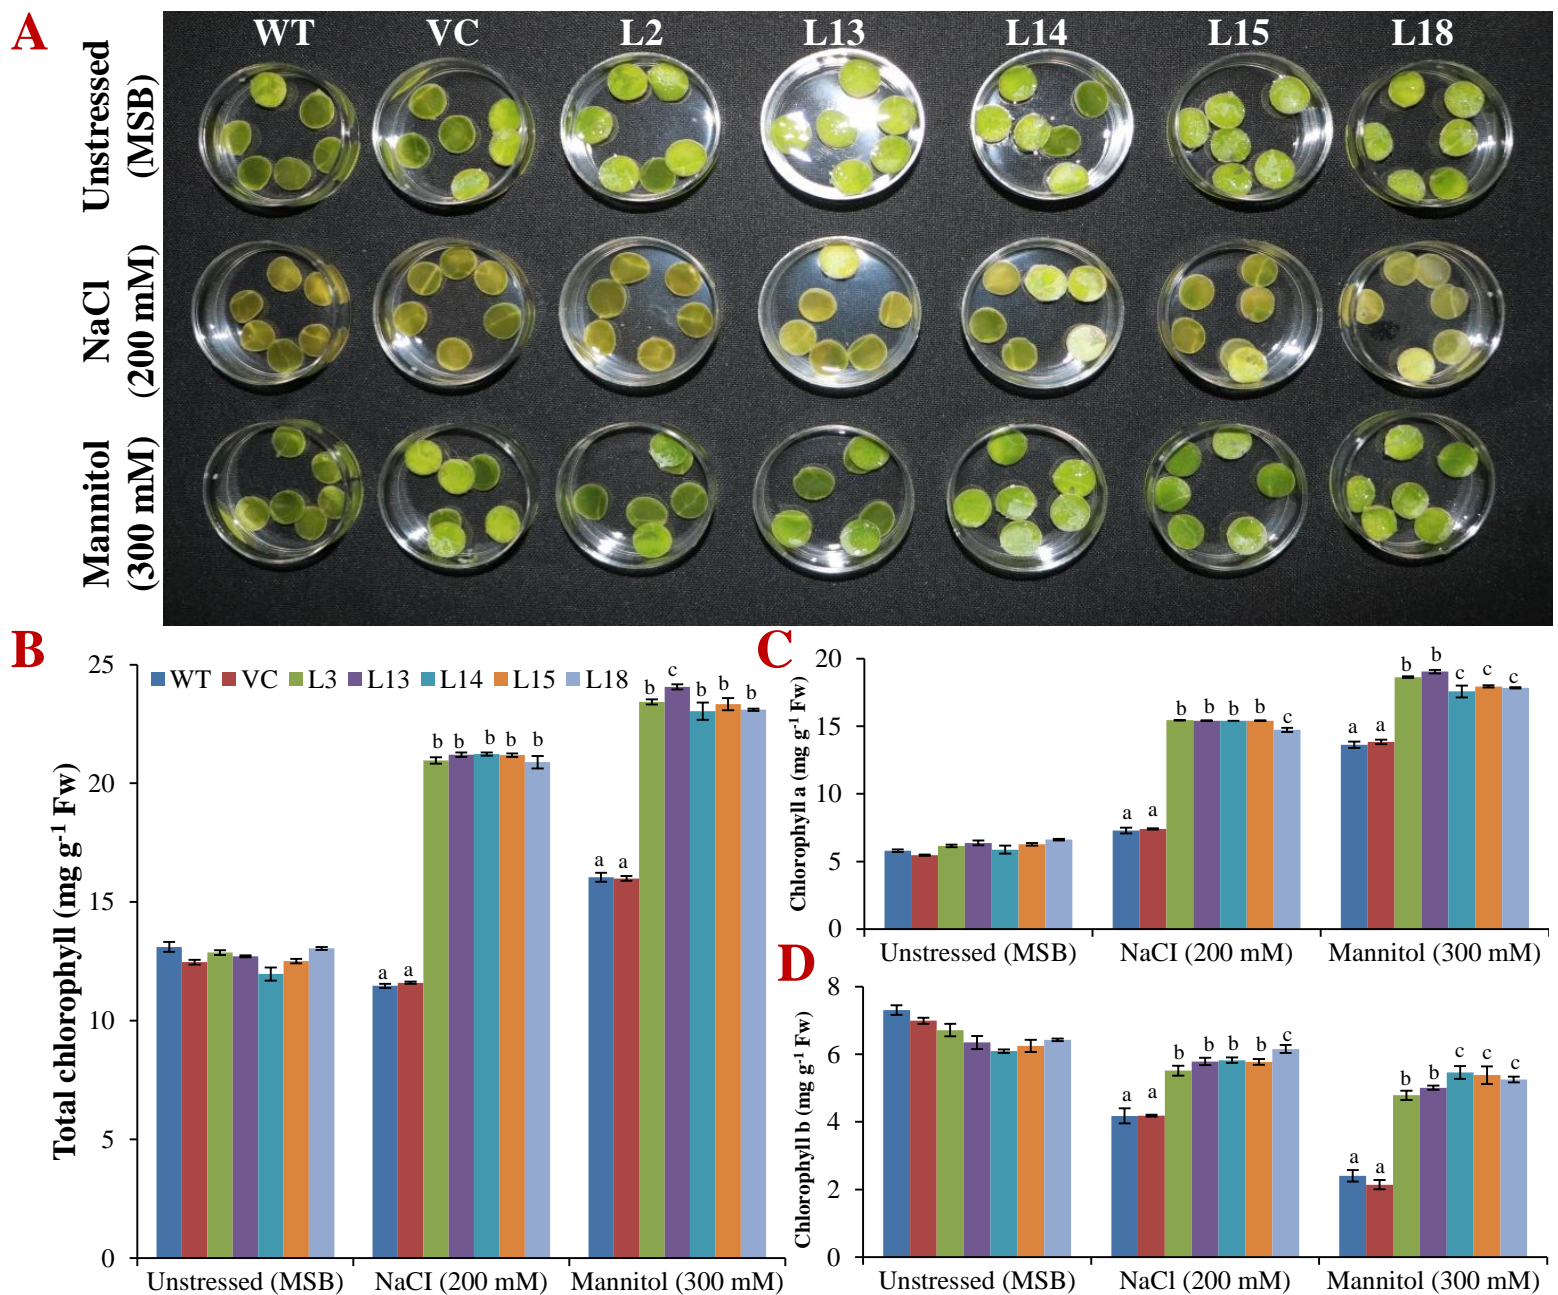

**Figure S5: Leaf senescence and chlorophyll content analysis.** The senescence assay (A) showed reduced chlorosis and less damage (necrosis) in transgenic compared to control plants and unstressed conditions. Further transgenic lines showed high (B) total chlorophyll, (C) chlorophyll a, and (D) chlorophyll b under salinity and osmotic stress conditions. Bars represent means  $\pm$  SE and values with different letters are significant at  $p < 0.05$ .

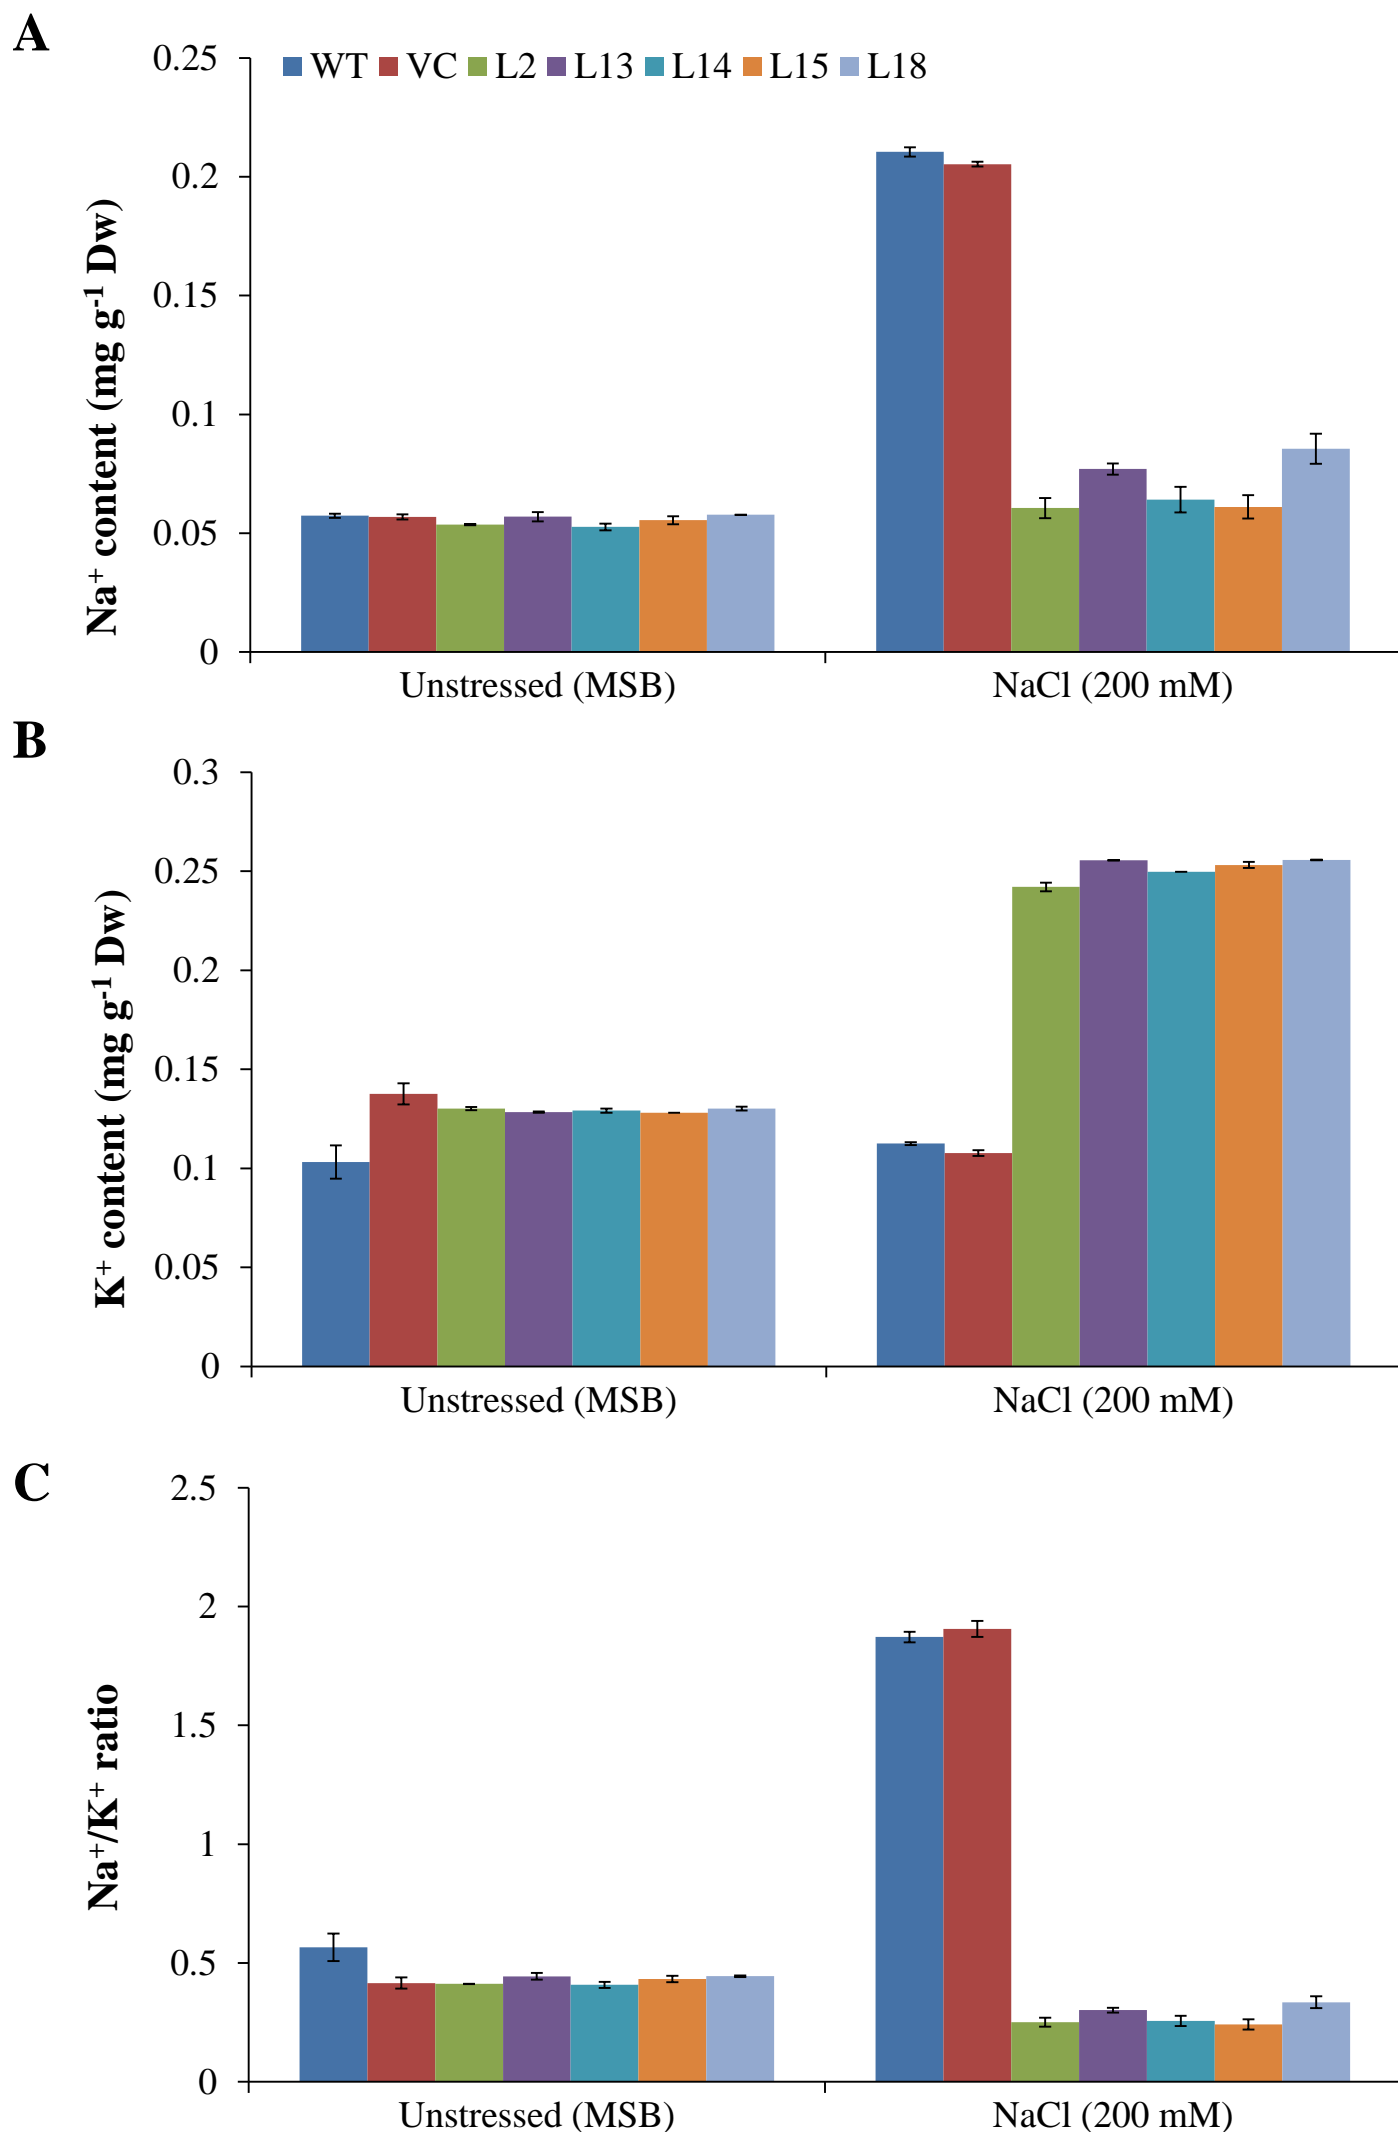

**Figure S6: Ion content analysis.** (A) Na ion, (B) K ion and (C) Na<sup>+</sup>/K<sup>+</sup> ratio were estimated in the transgenic plants under salt stress condition and compared with control plants. Bars represent means  $\pm$  SE and values.

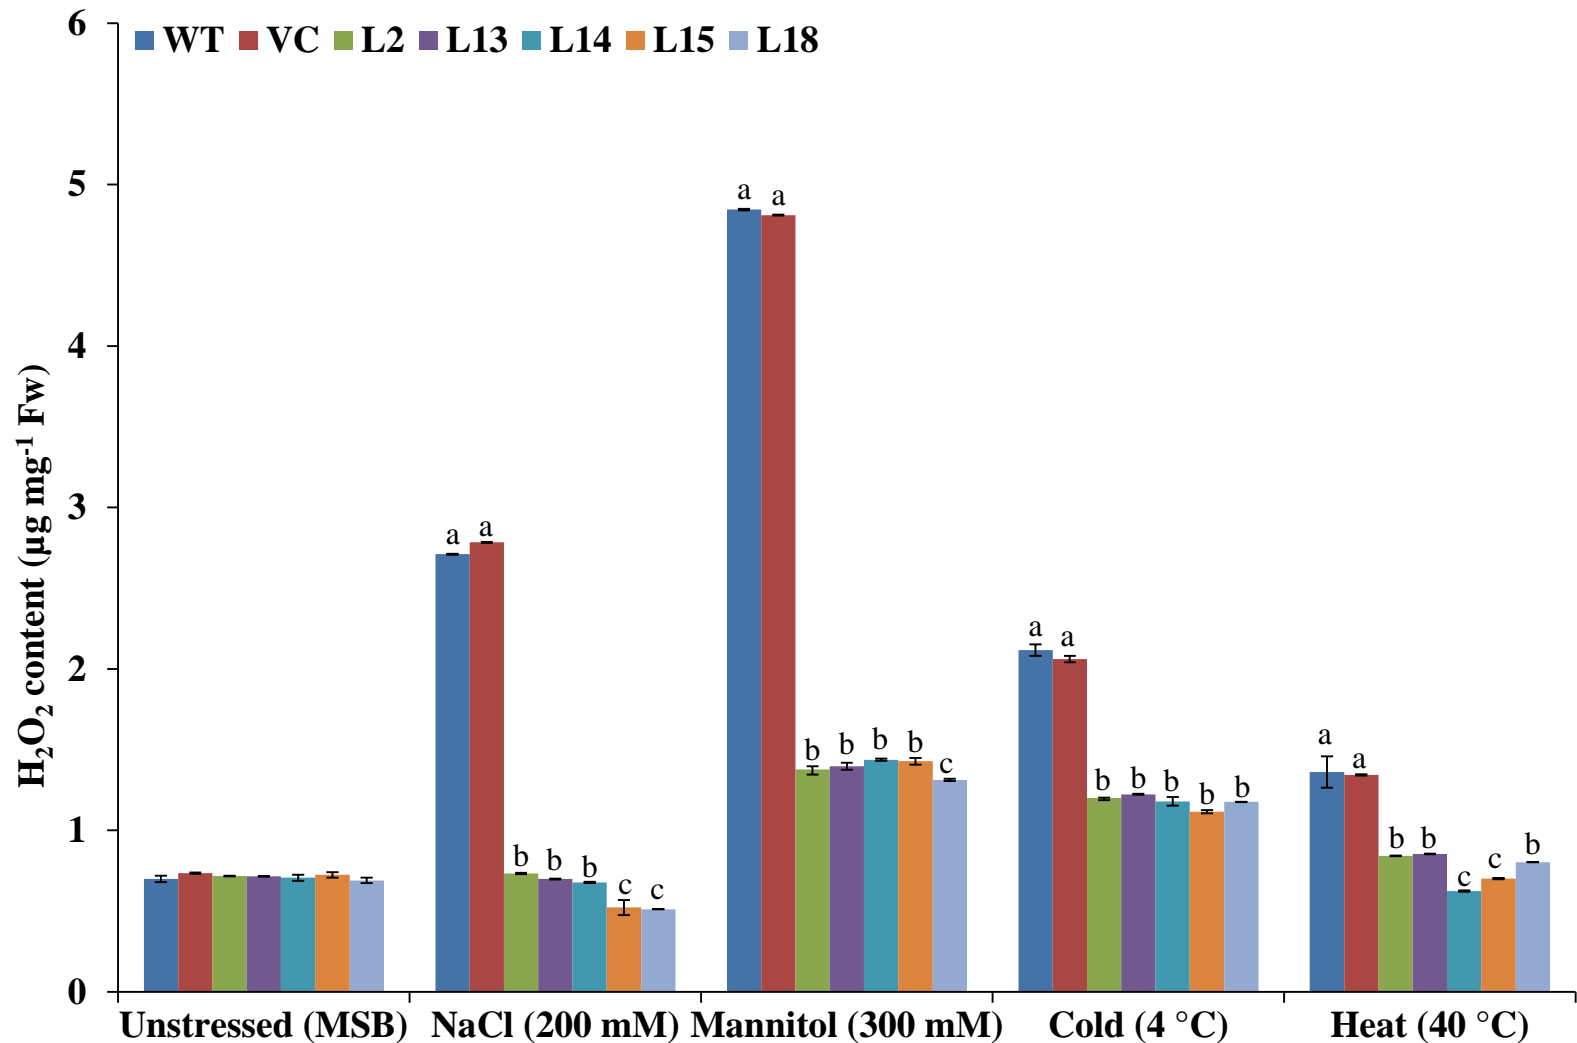

**Figure S7: Analysis of  $H_2O_2$  content.** Quantitative analyses of  $H_2O_2$  content of transgenic lines (L2, L13, L14, L15 and L18) and control plants (WT and CV) grown under unstressed (MSB), salt (200 mM NaCl), osmotic (300 mM mannitol), cold (4 °C), and heat (40 °C) stress conditions. Bars represent means  $\pm$  SE and values with different letters are significant at  $p < 0.05$ .



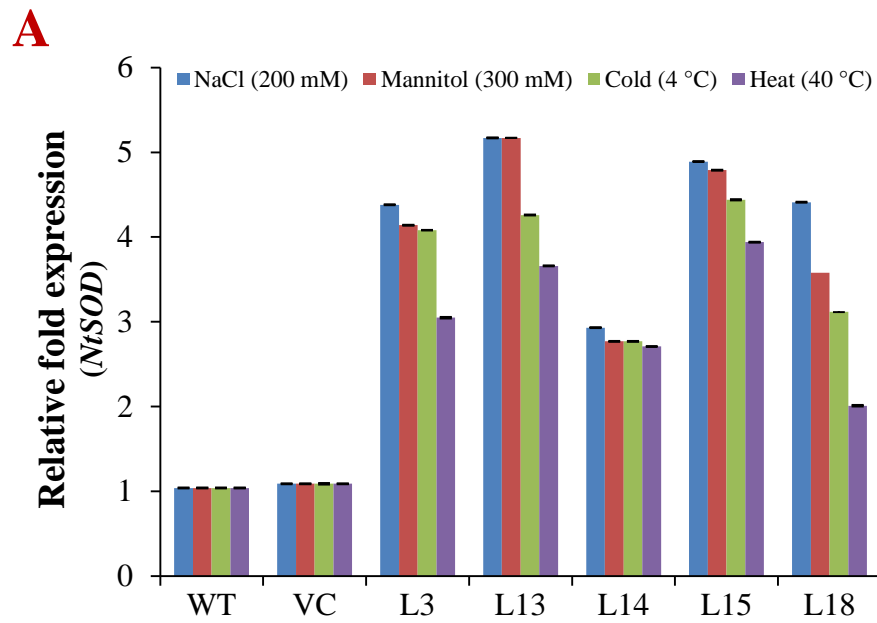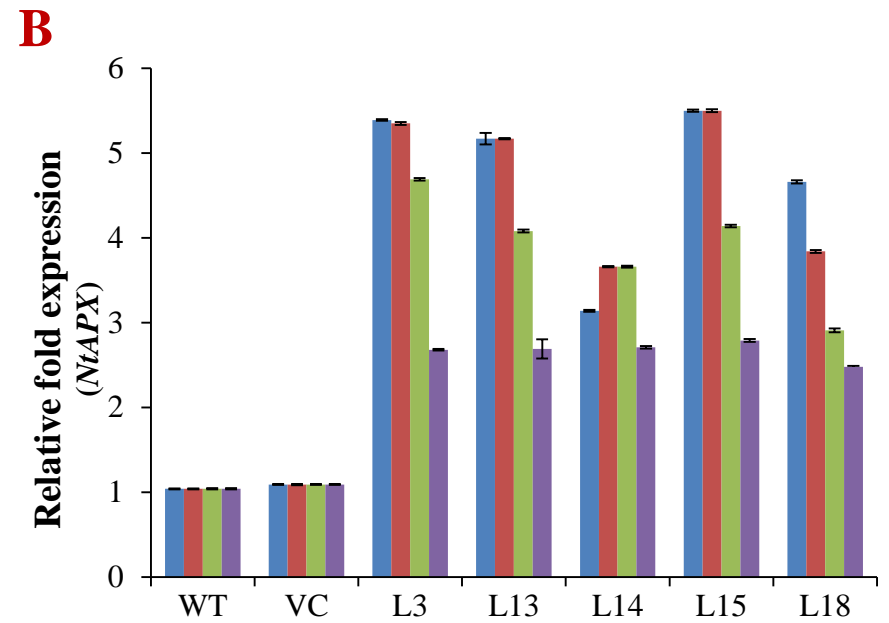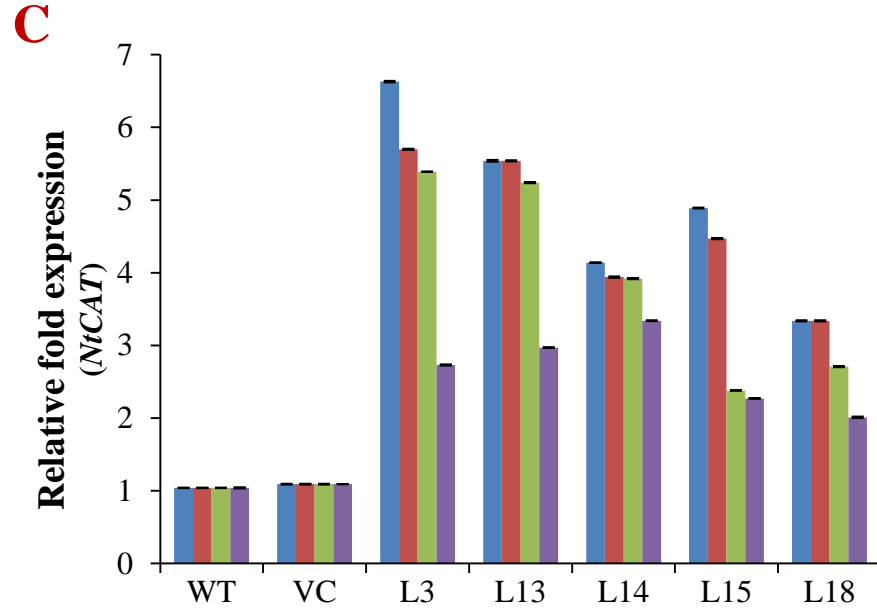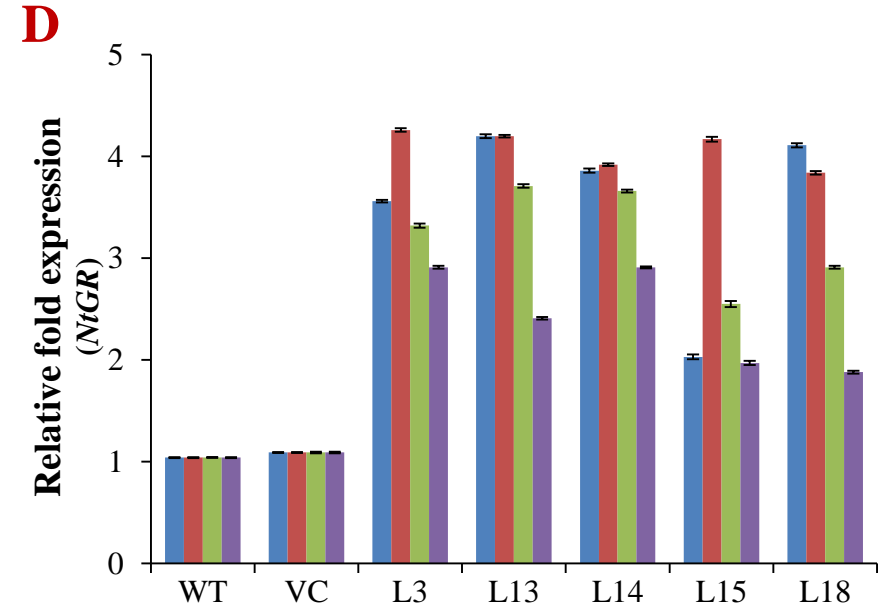

**Figure S8: Transcript expression analysis of ROS scavenging antioxidant enzyme encoding genes.** The relative fold expression of (A) *NtSOD* gene encoding superoxide dismutases, (B) *NtAPX* encoding ascorbate peroxidase, (C) *NtCAT* encoding catalase, and (D) *NtGR* encoding glutathione reductase enzyme was analyzed under different stress conditions. Bars represent means  $\pm$  SE and values.
